# Supplementary material for: A highly efficient and recyclable Fe3O4 magnetic nanoparticle immobilized palladium catalyst for the direct C-2 arylation of indoles with arylboronic acids
Source: Royal Society of Chemistry journal article supplement (doi:10.1039/c4cy00040d), 2014-01-01

## Catalysis Science & Technology

### *Supporting Information*

#### **A Highly Efficient and Recyclable Fe<sub>3</sub>O<sub>4</sub> Magnetic Nanoparticles Immobilized Palladium Catalyst for the Direct C-2 Arylation of Indoles with Arylboronic Acids**

Lei Zhang,<sup>[a]</sup> Pinhua Li,<sup>[a]</sup> Can Liu,<sup>[a]</sup> Jin Yang,<sup>[a]</sup> Min Wang<sup>[a]</sup> and Lei Wang,<sup>\*[a] [b]</sup>

[a] Department of Chemistry, Huaibei Normal University, Huaibei, Anhui 235000, P R China E-  
mail: leiwang@chnu.edu.cn

[b] State Key Laboratory of Organometallic Chemistry, Shanghai Institute of Organic Chemistry,  
Chinese Academy of Sciences, Shanghai 200032, P R China

### *Table of Contents for Supporting Information*

---

|                                                                     |   |
|---------------------------------------------------------------------|---|
| <sup>1</sup> H and <sup>13</sup> C NMR spectra of the products..... | 2 |
|---------------------------------------------------------------------|---|

#### **<sup>1</sup>H-NMR and <sup>13</sup>C-NMR Spectra of the products**

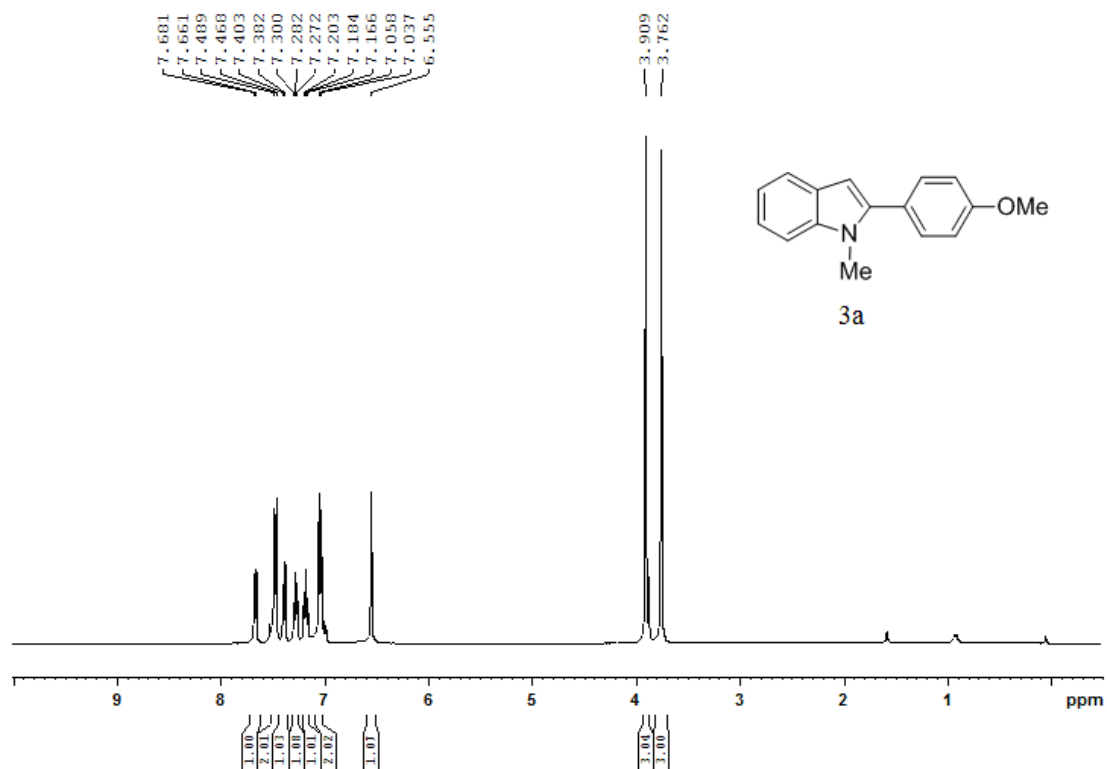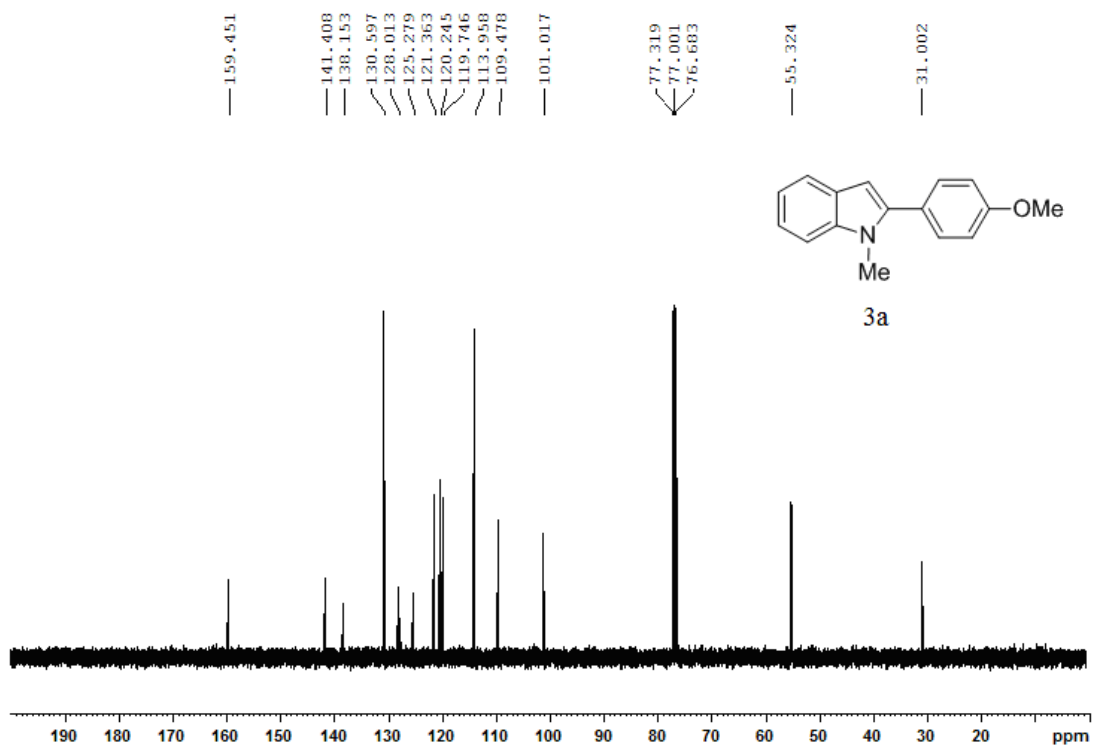

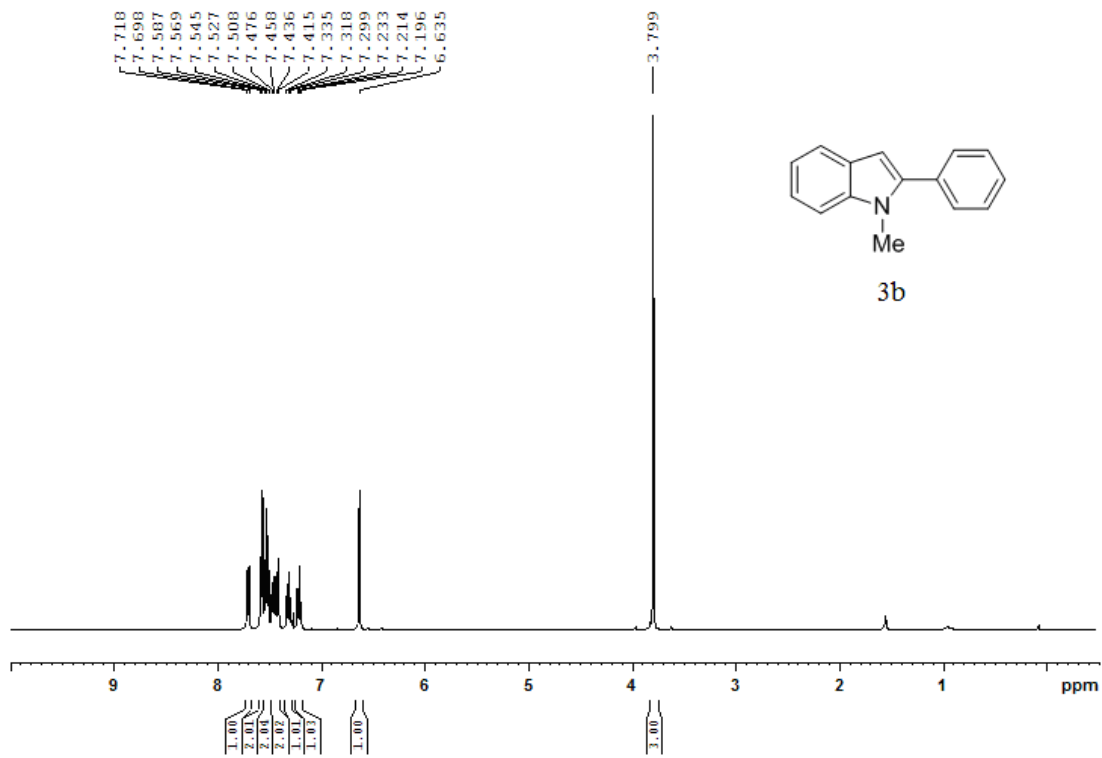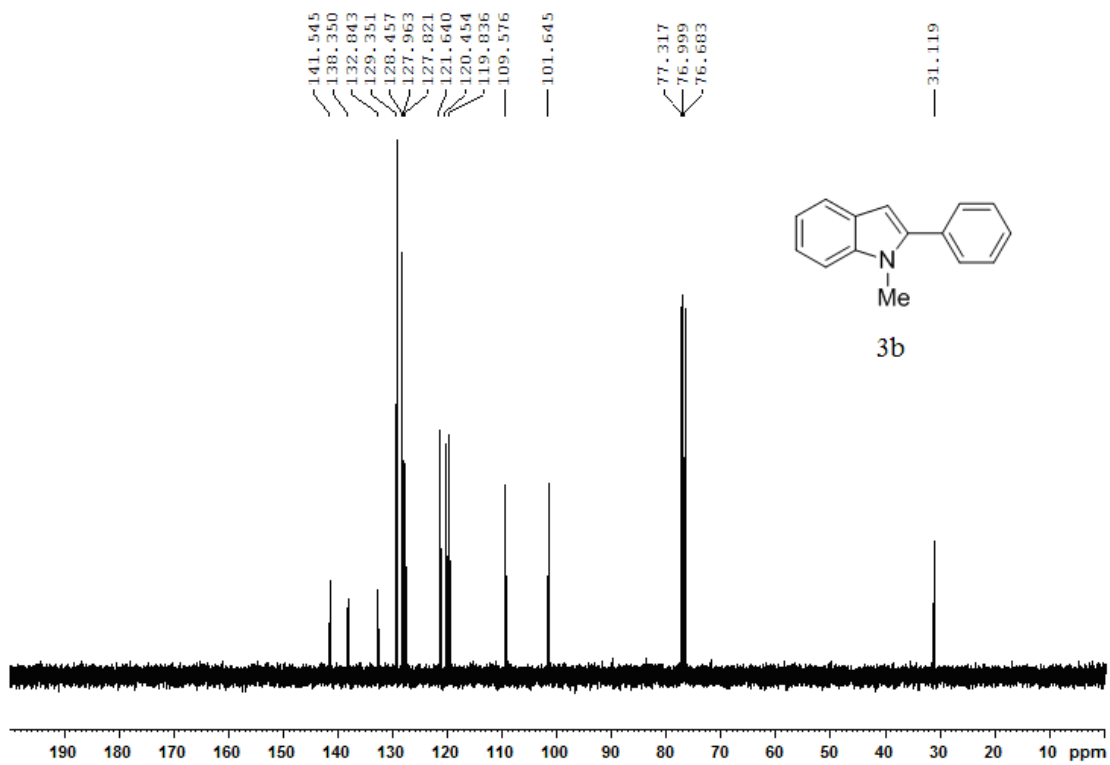

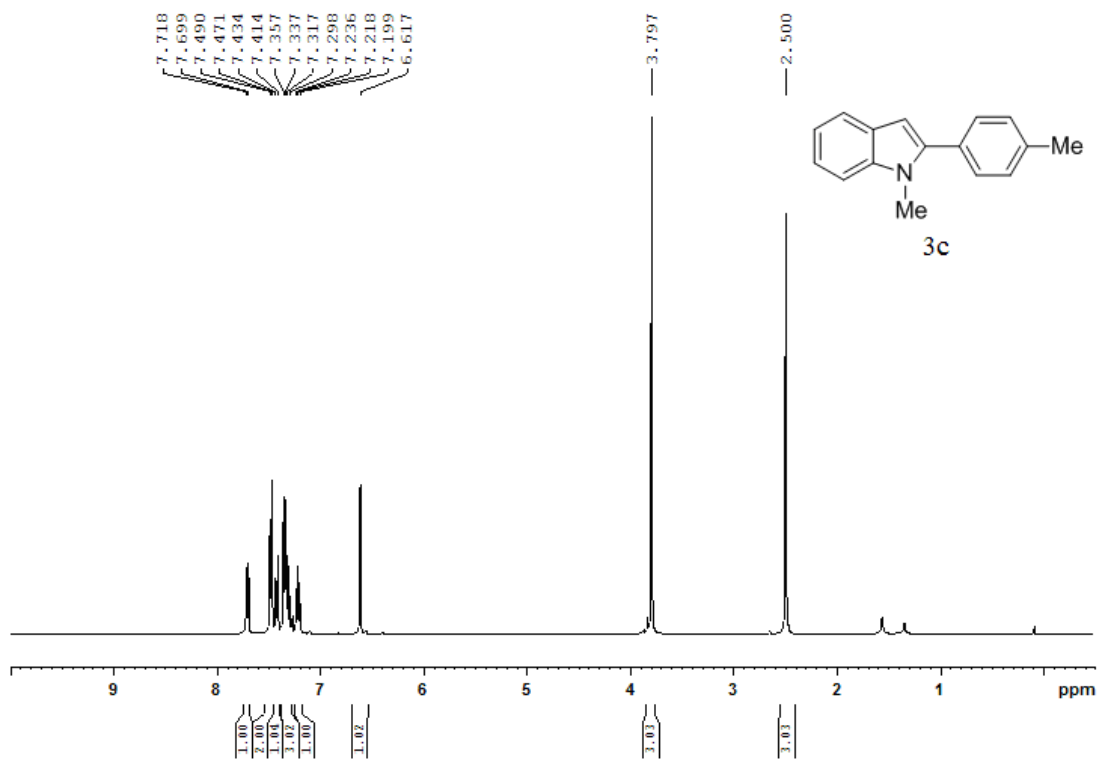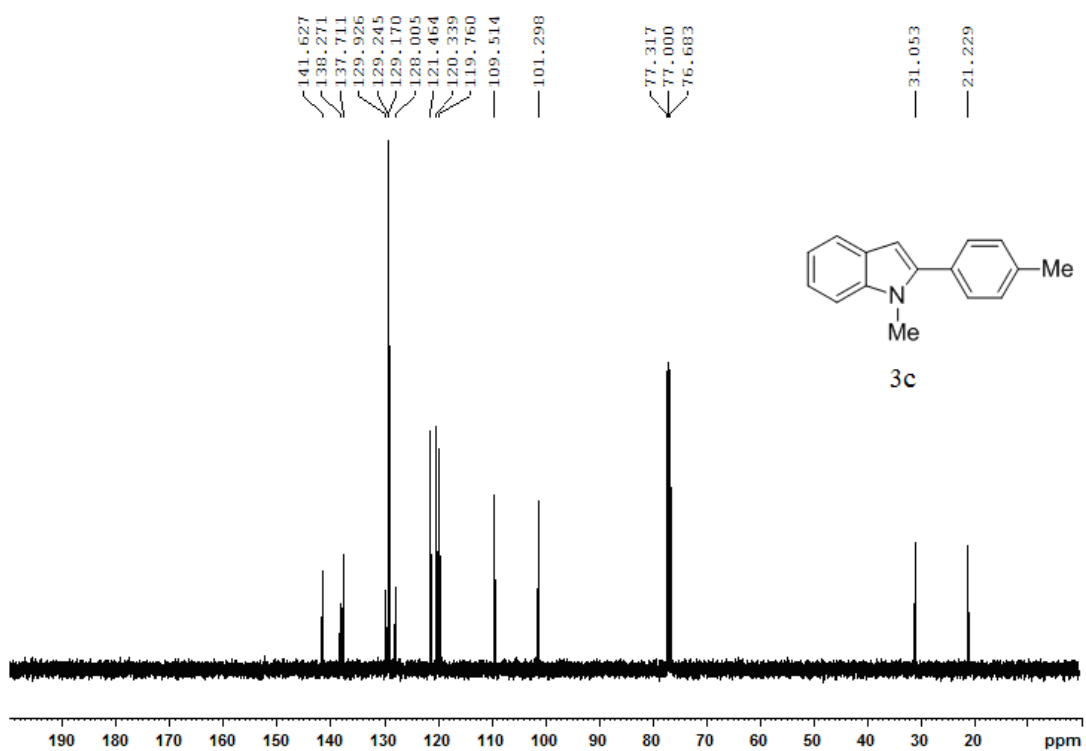

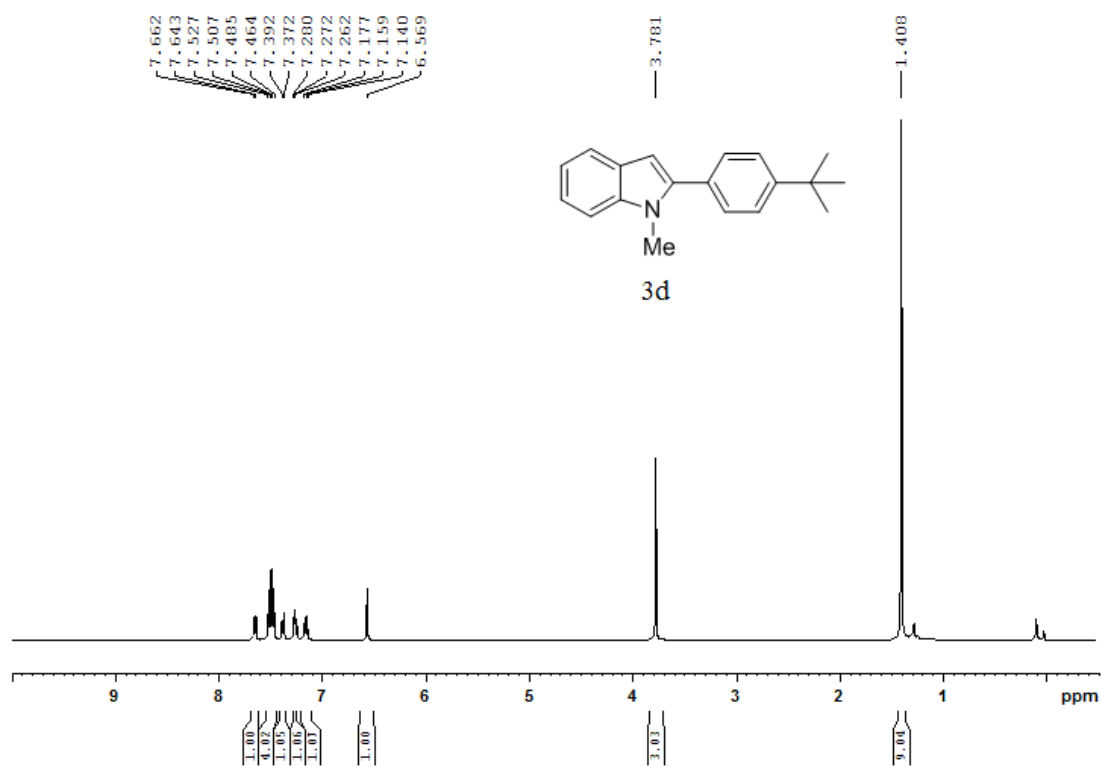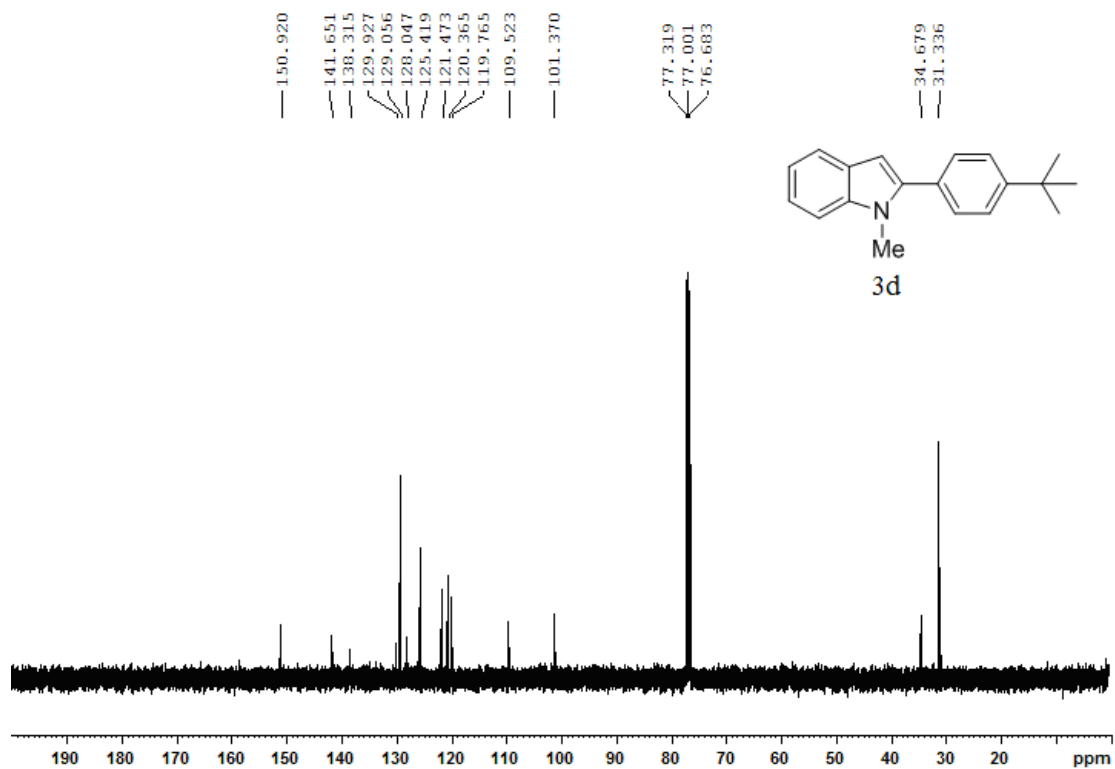

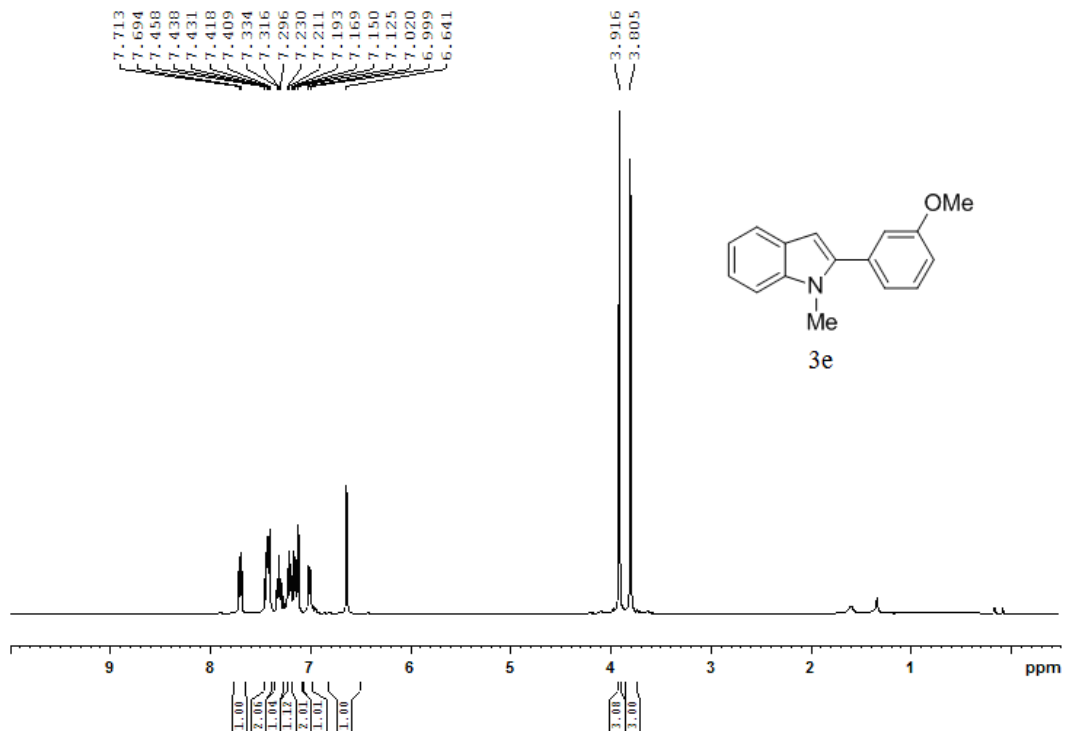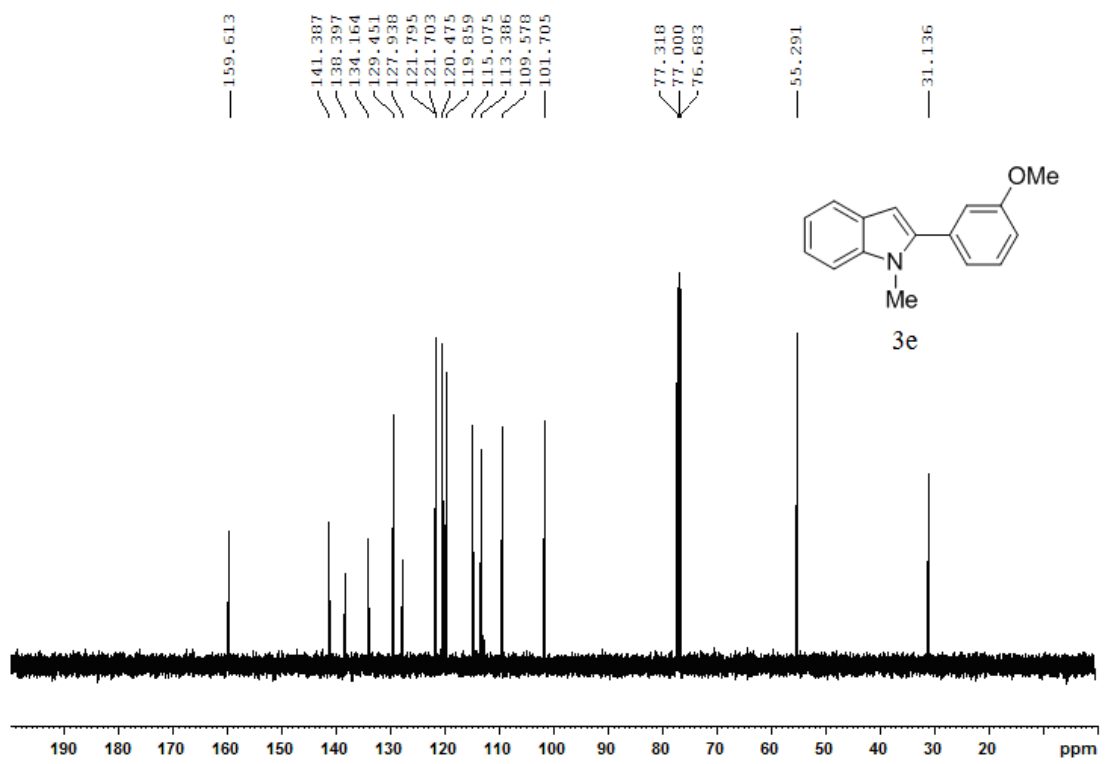

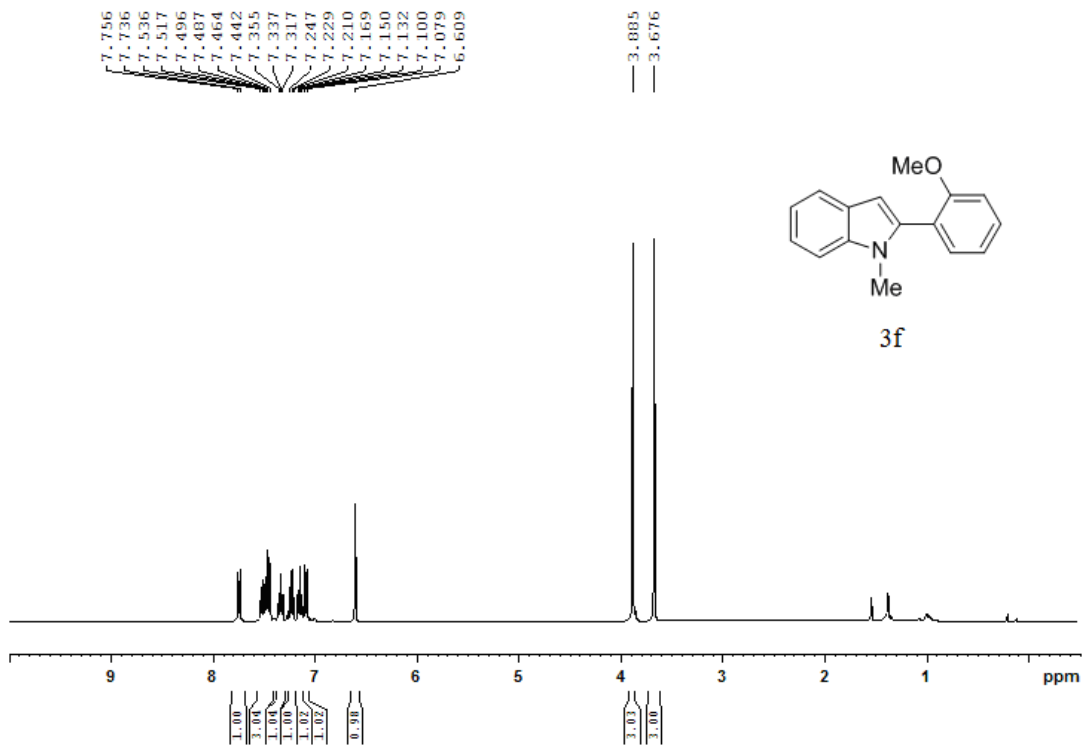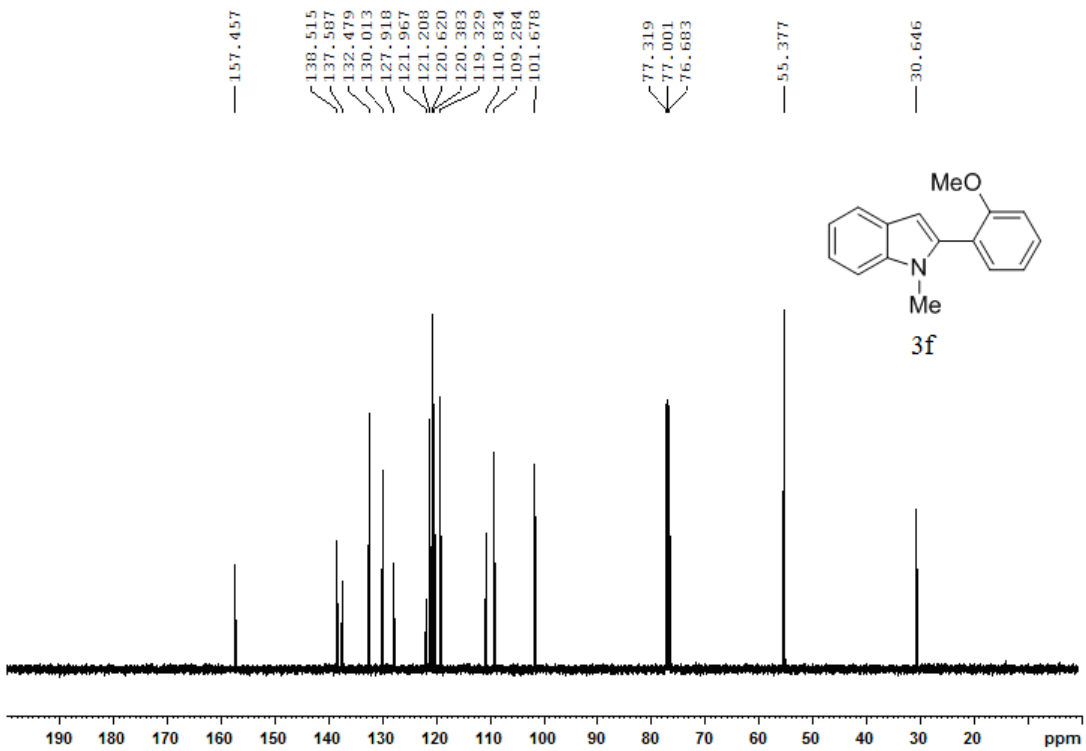





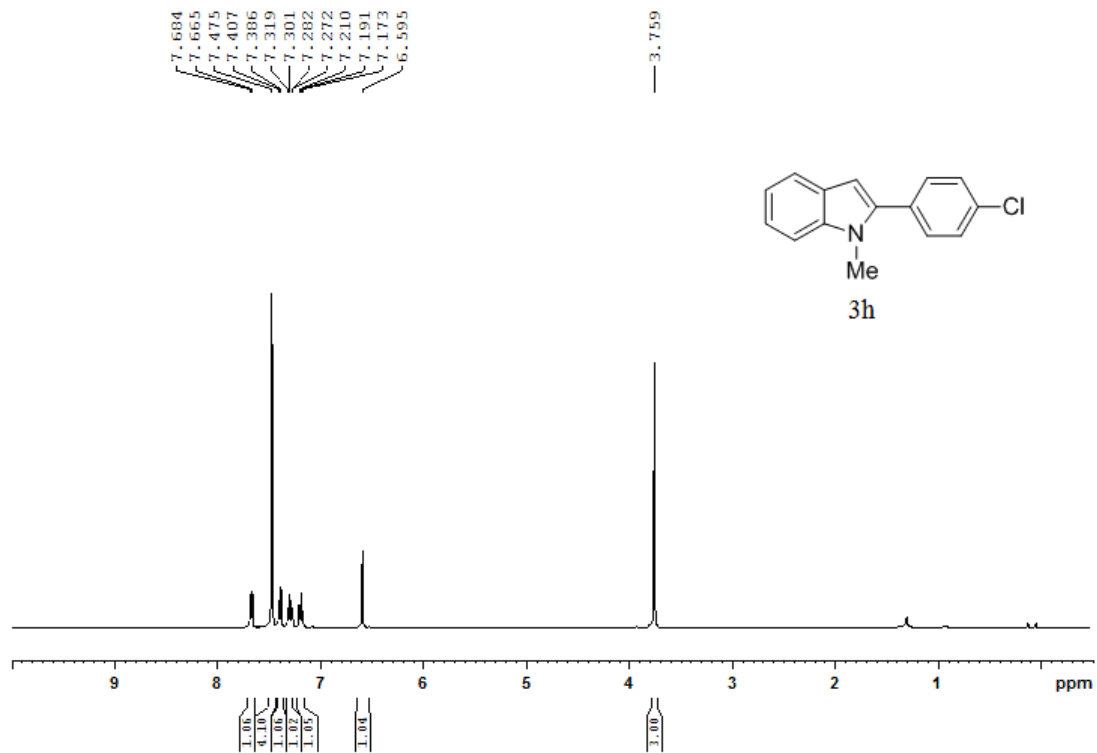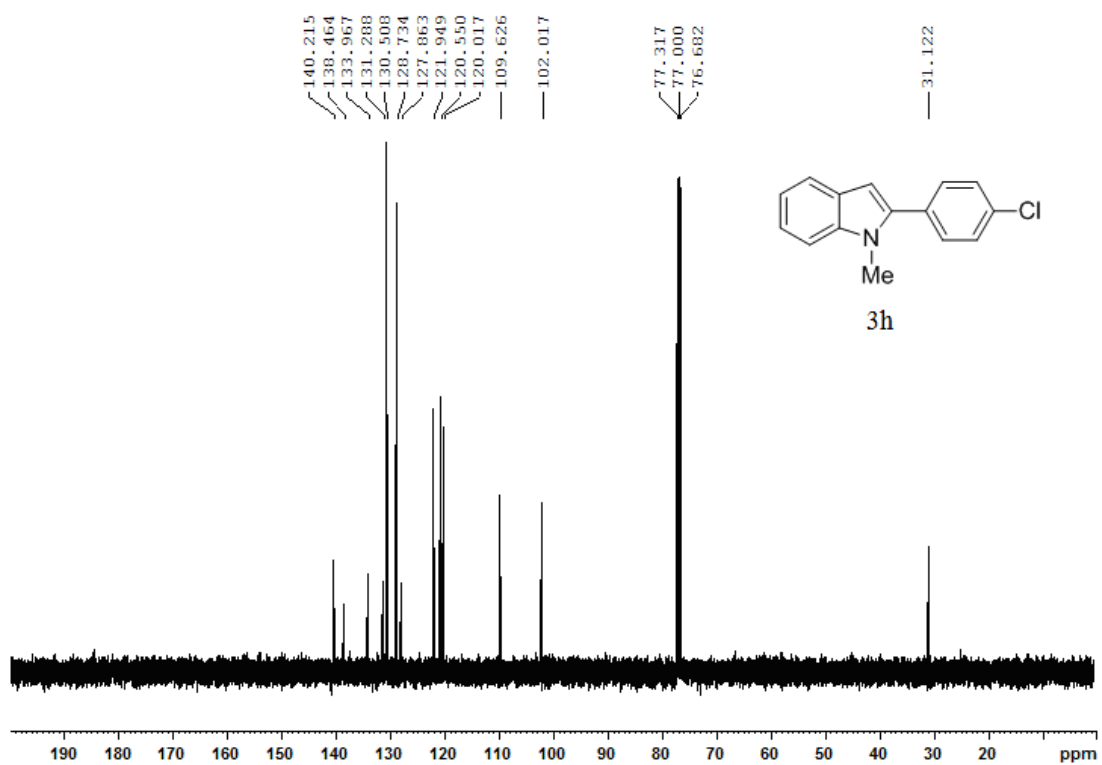

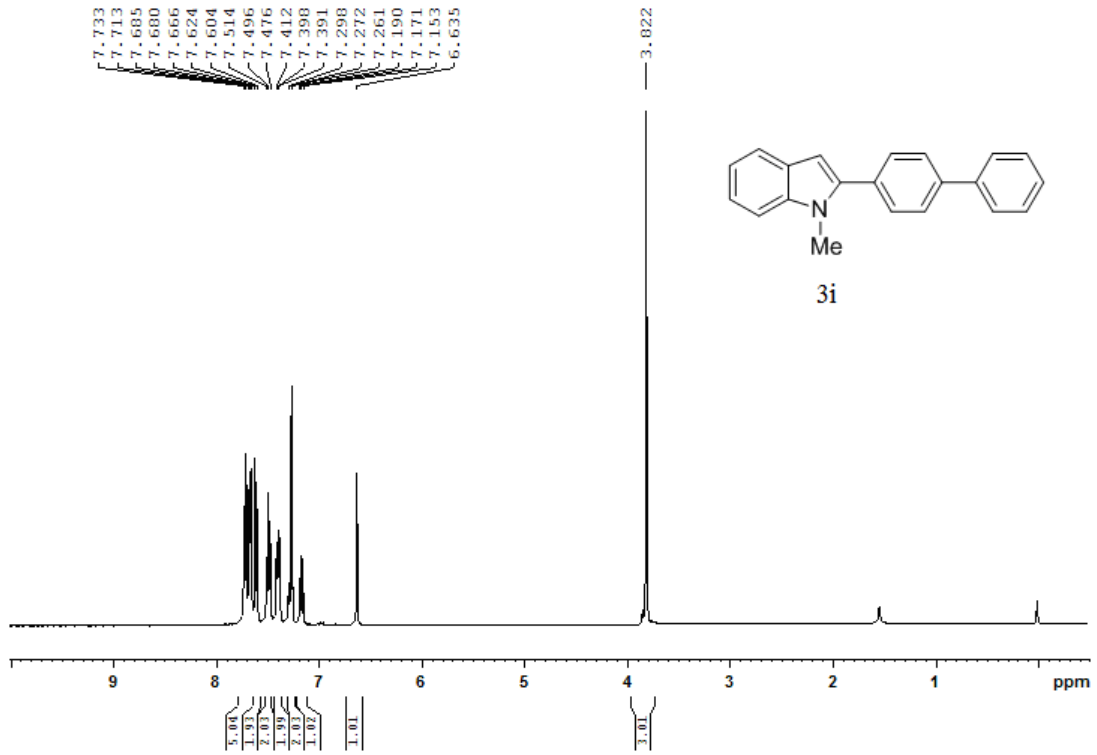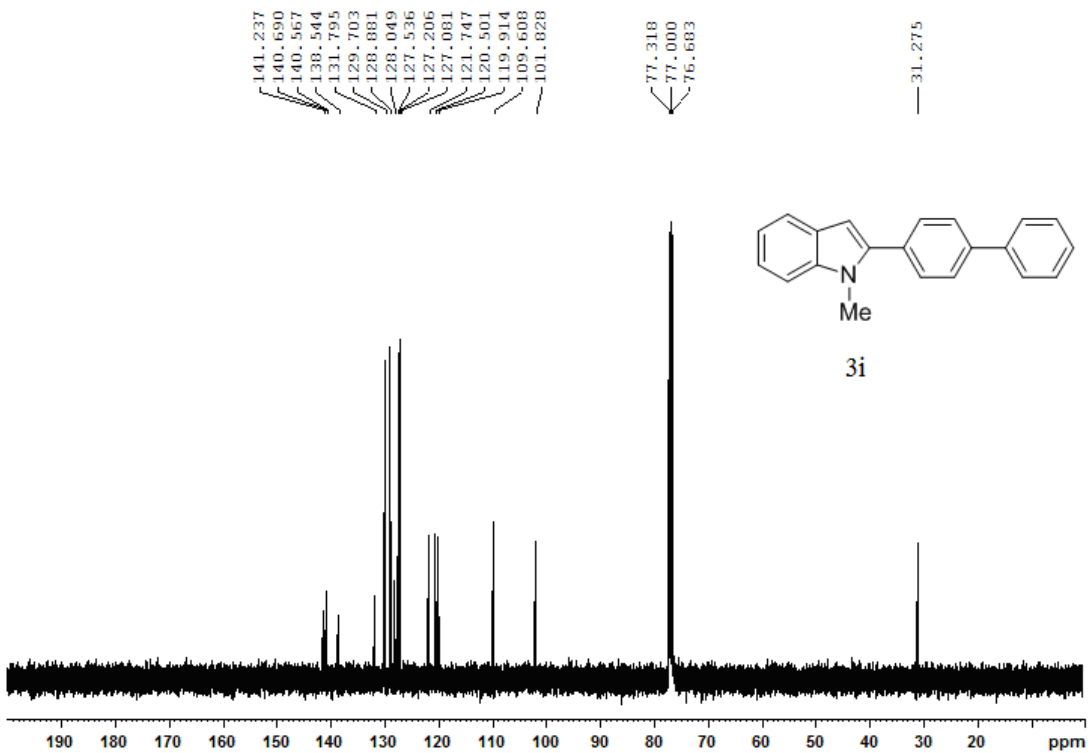

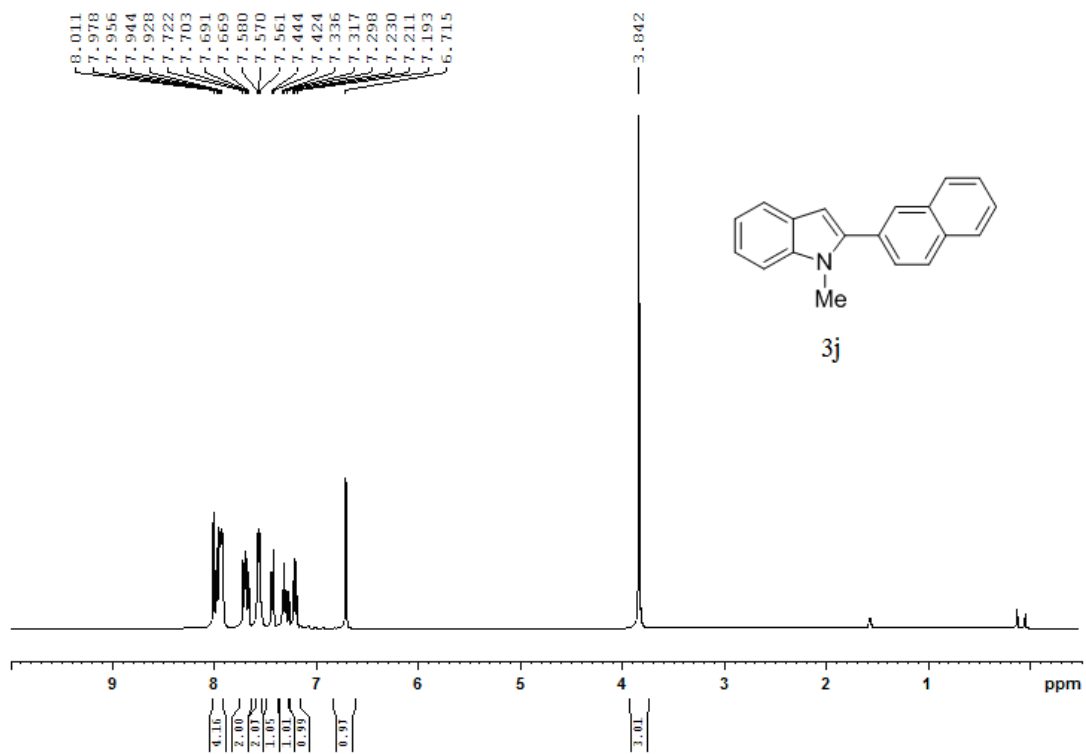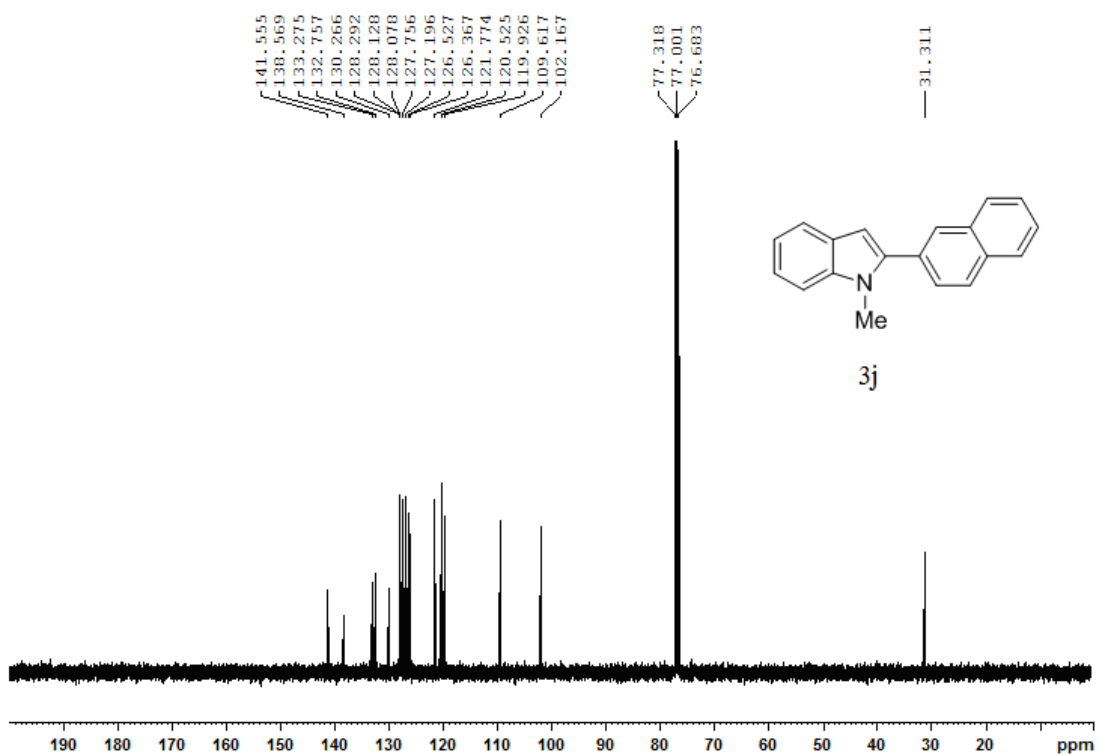

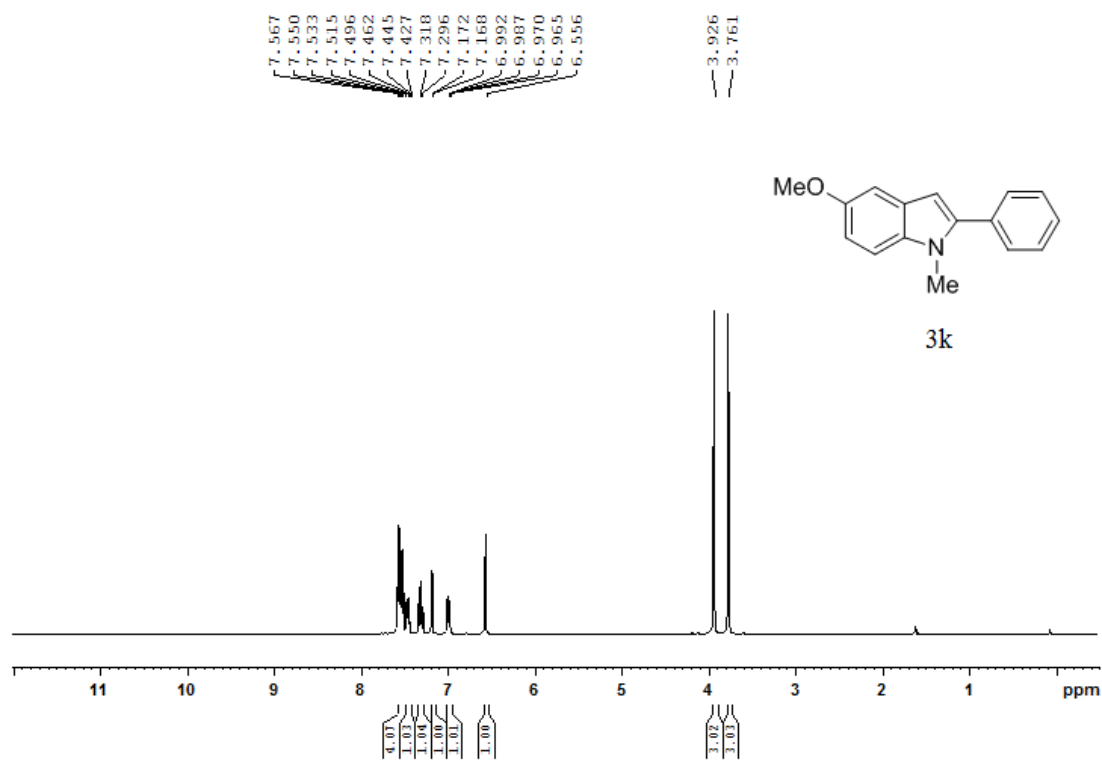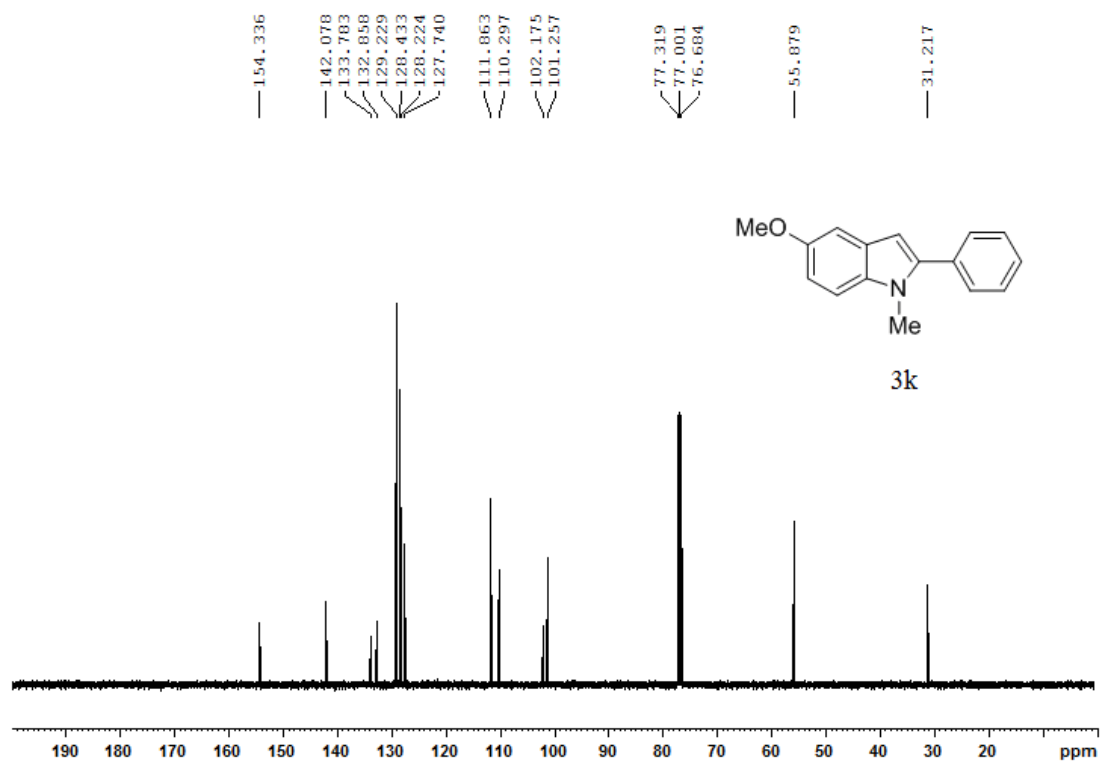

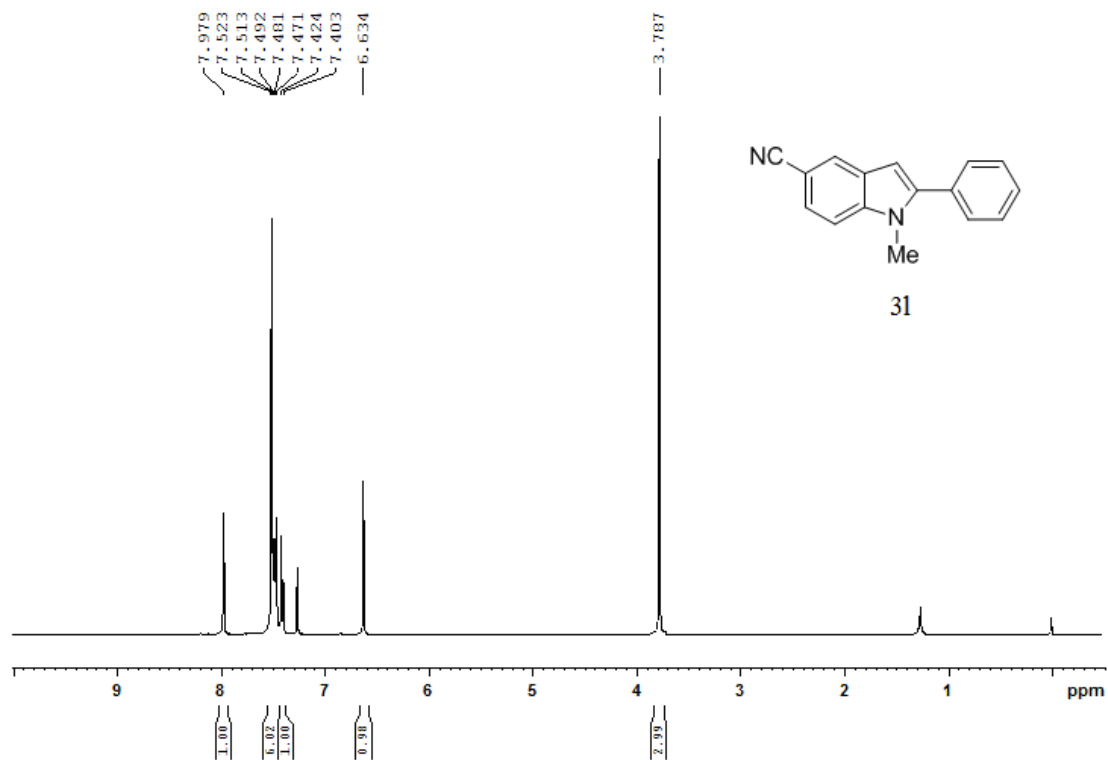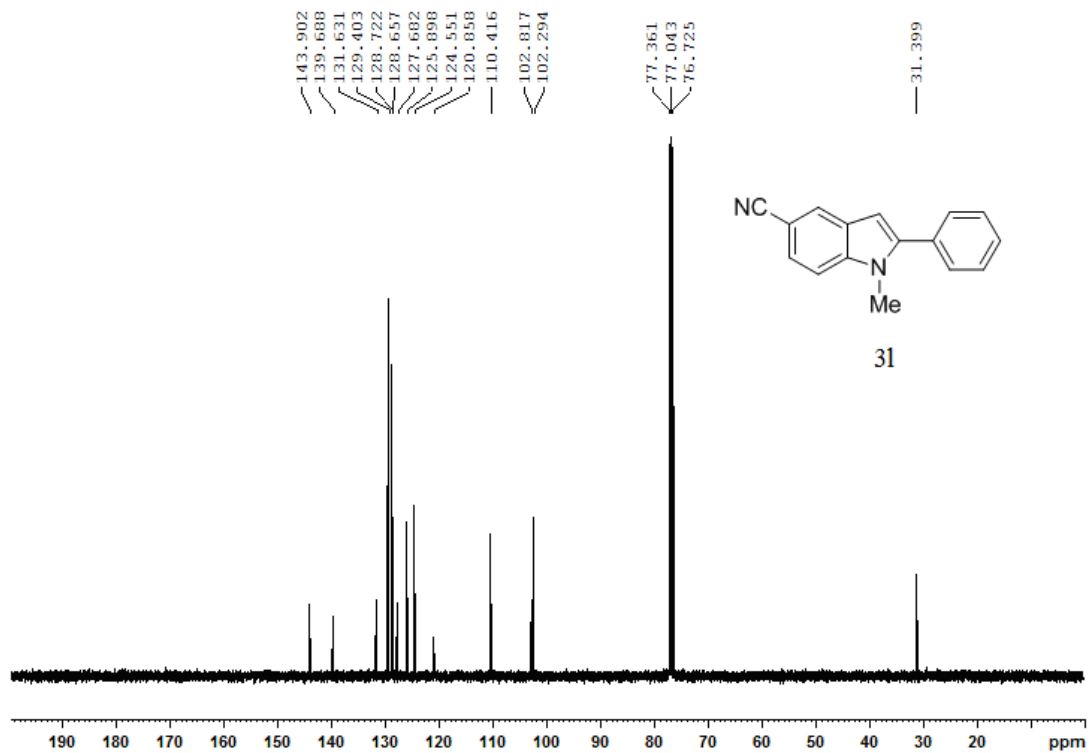

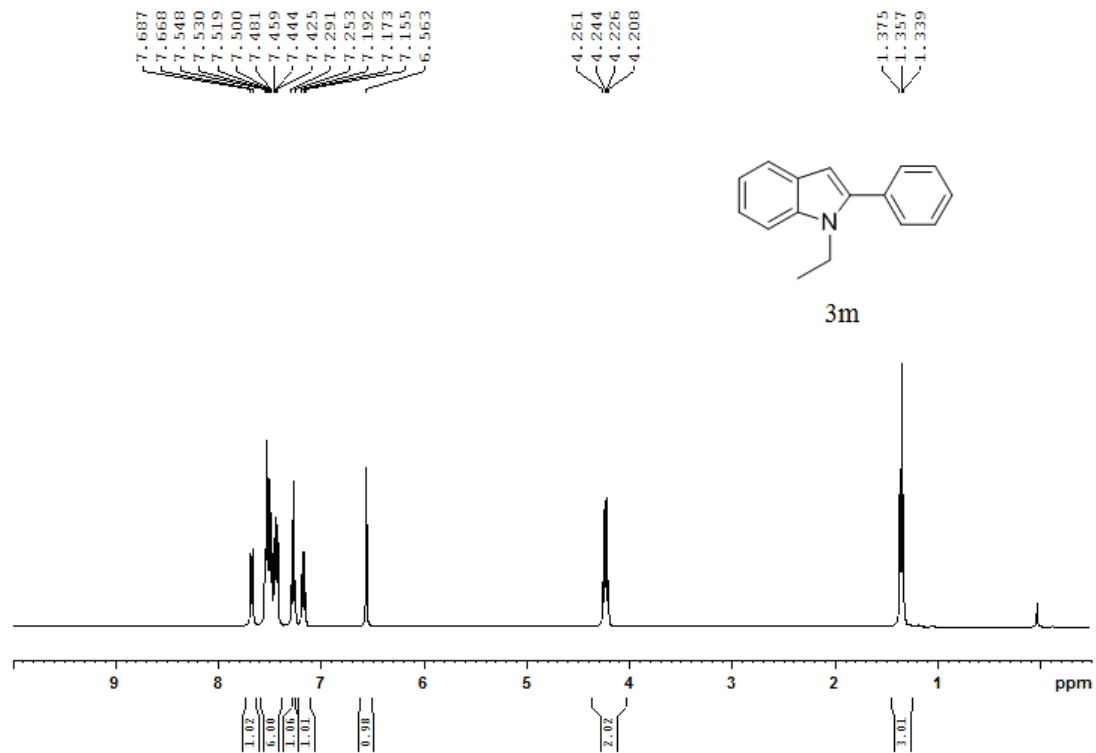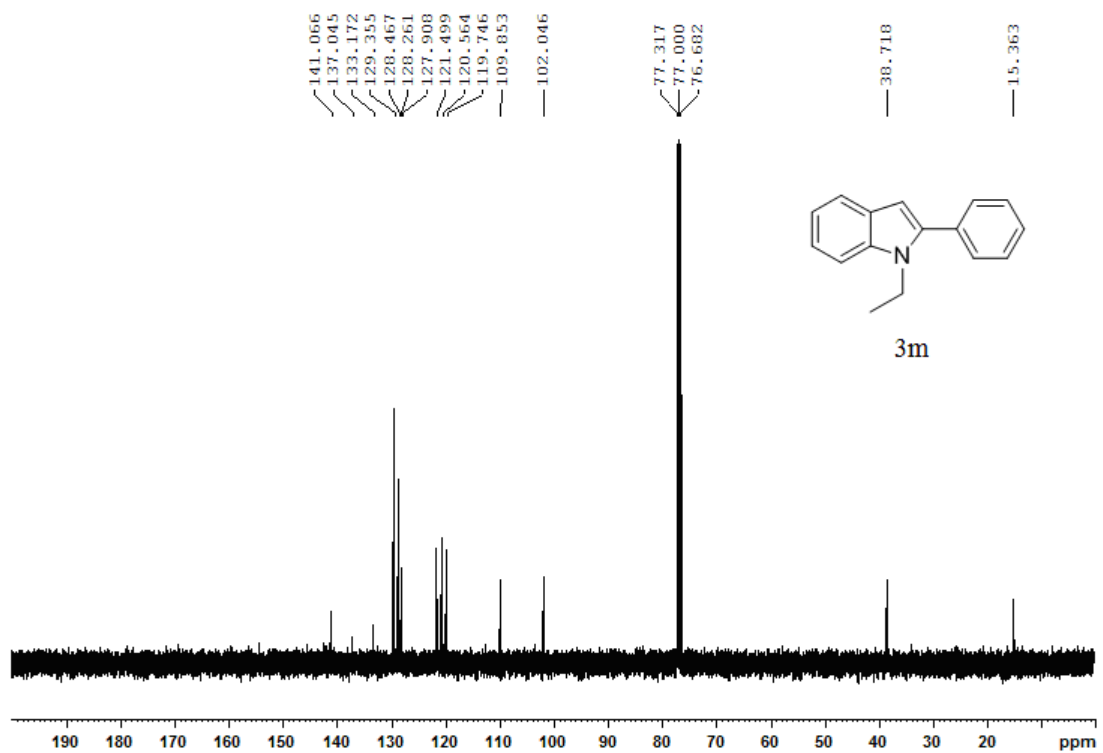

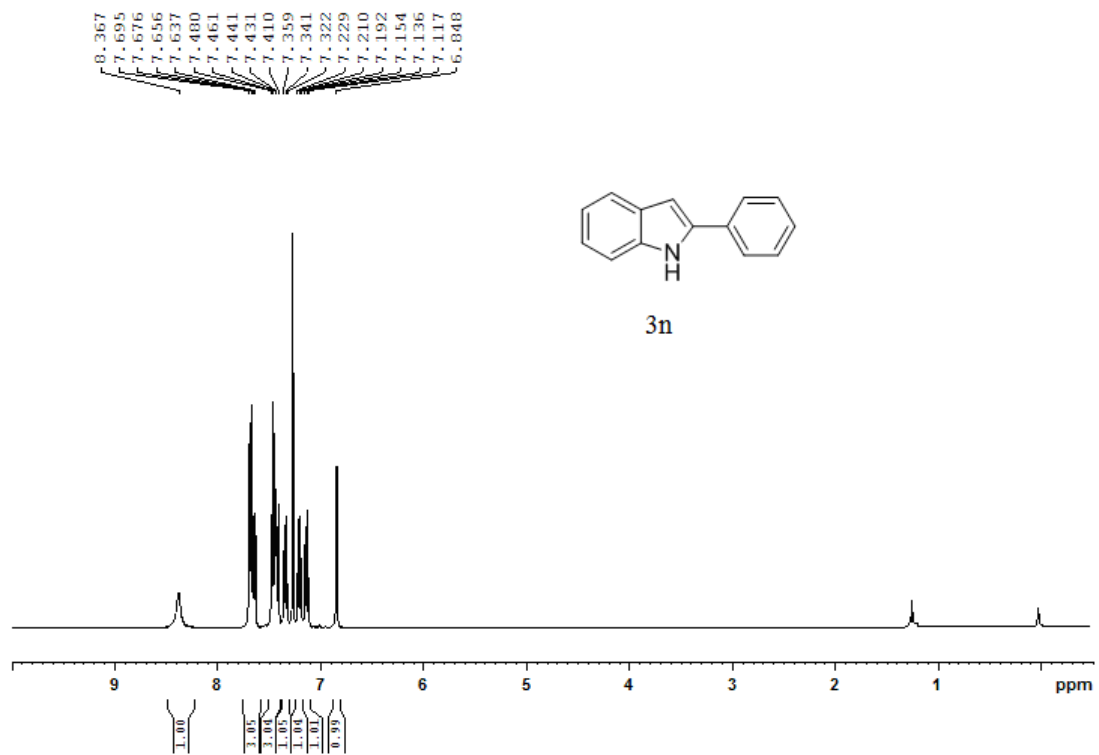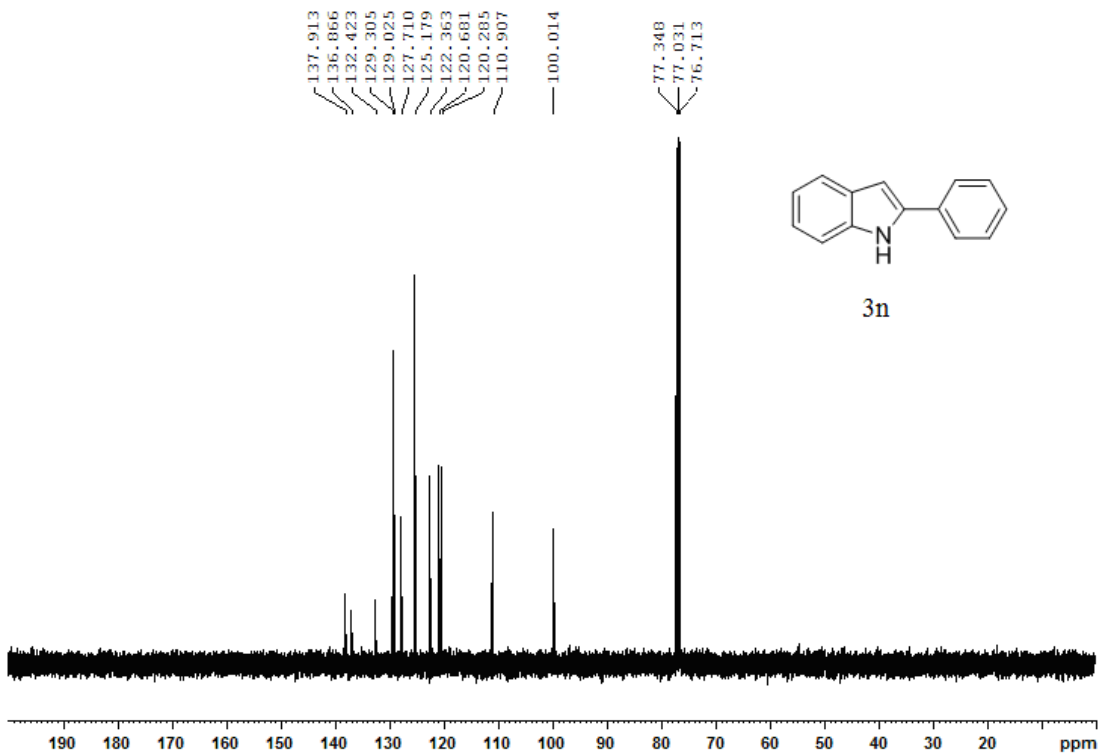

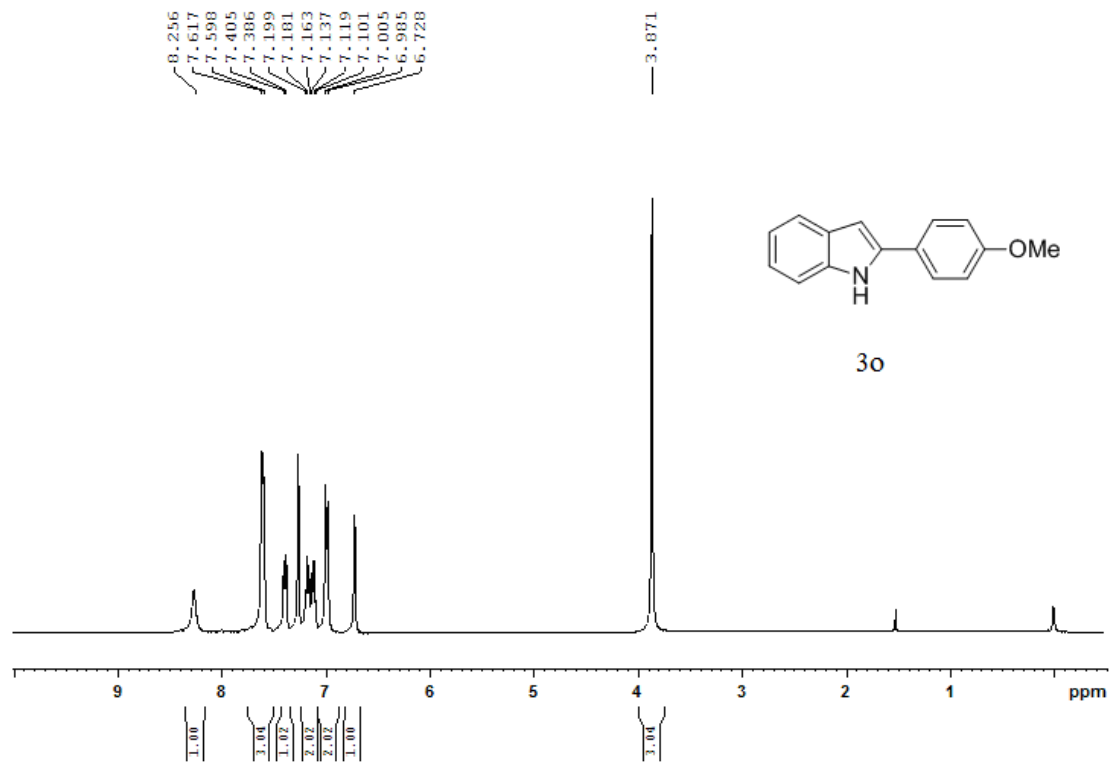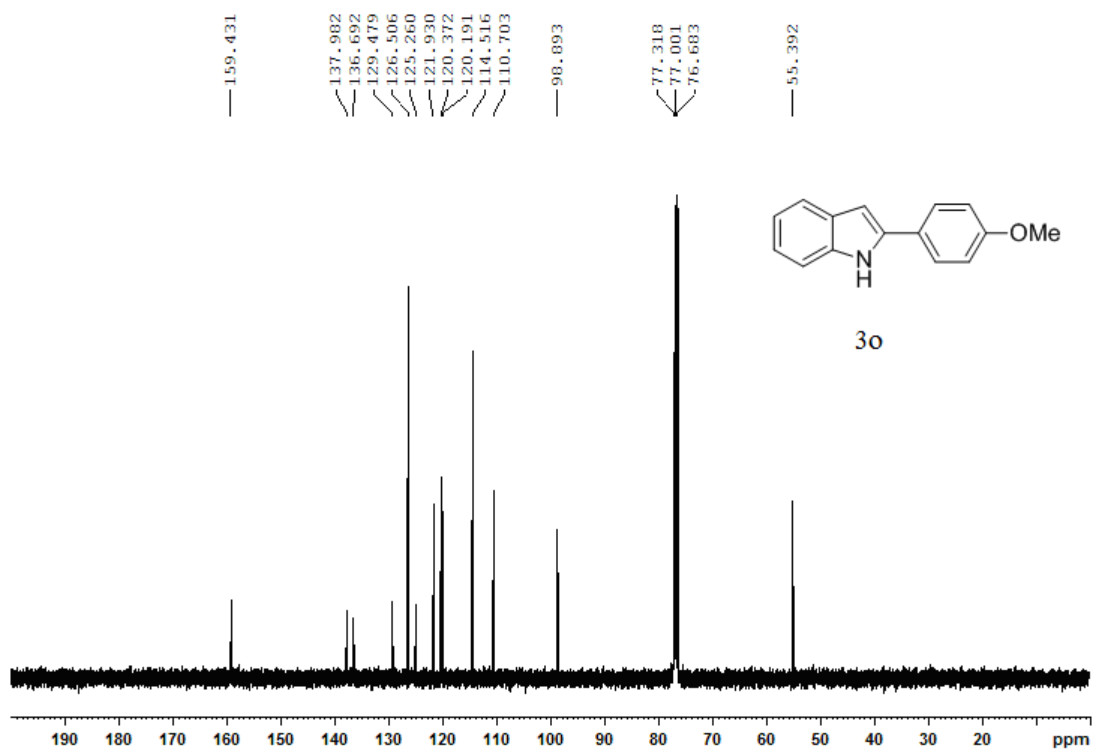



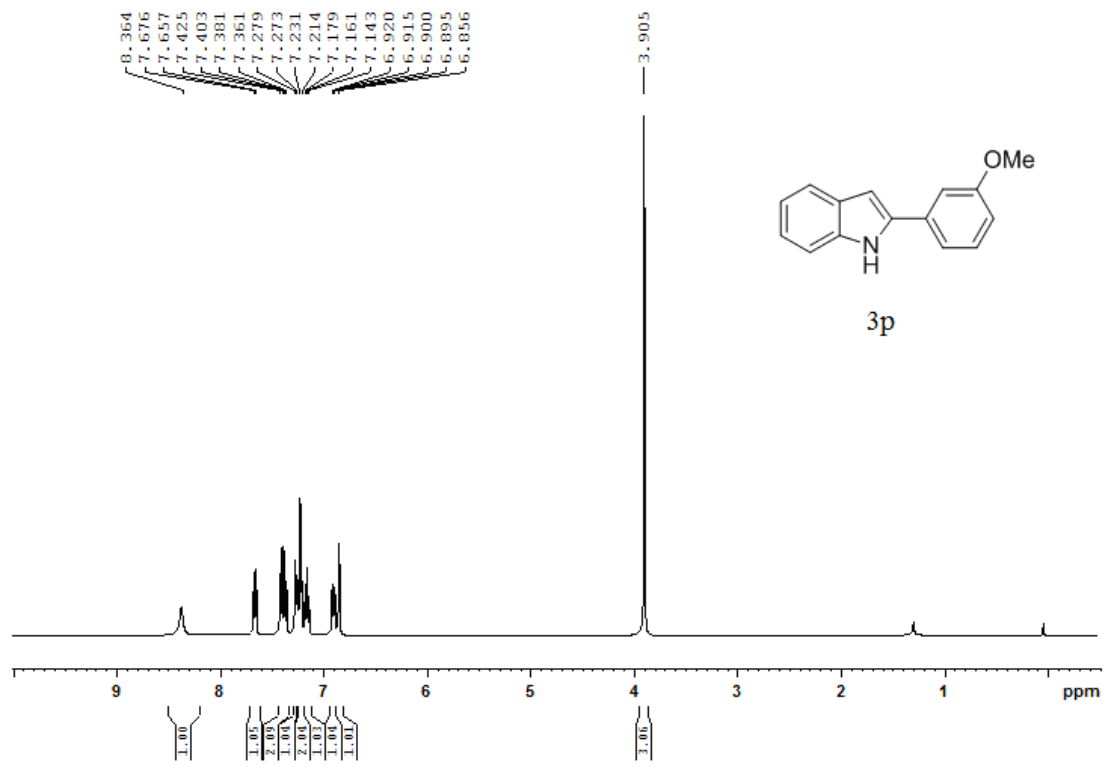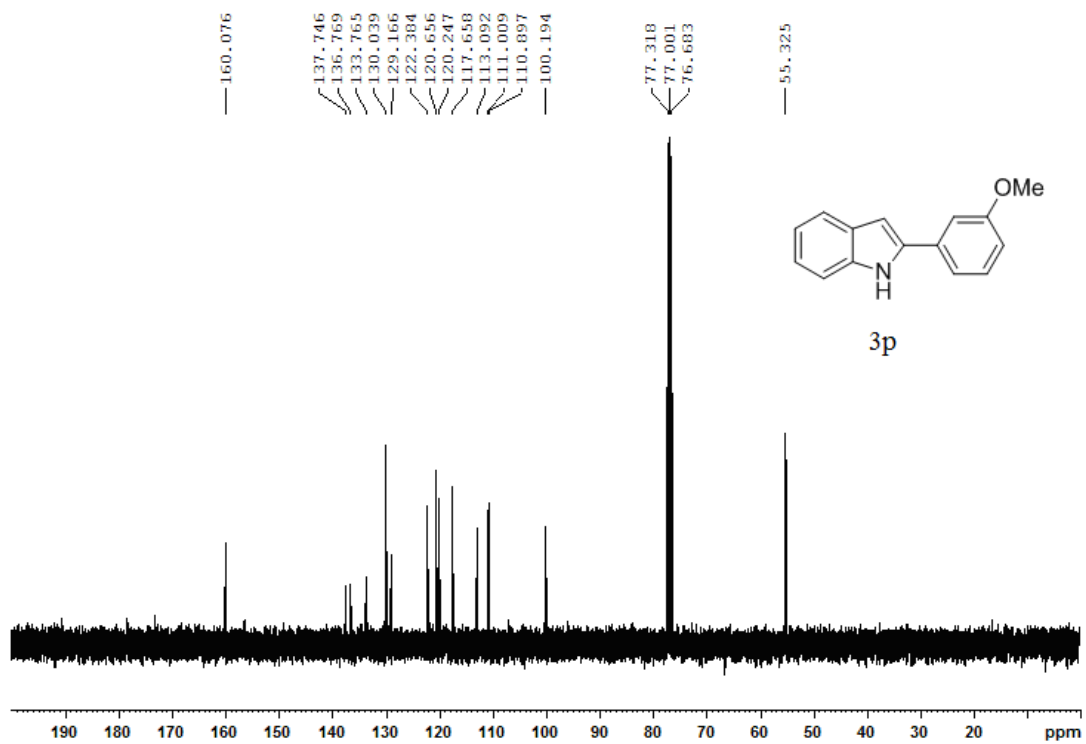

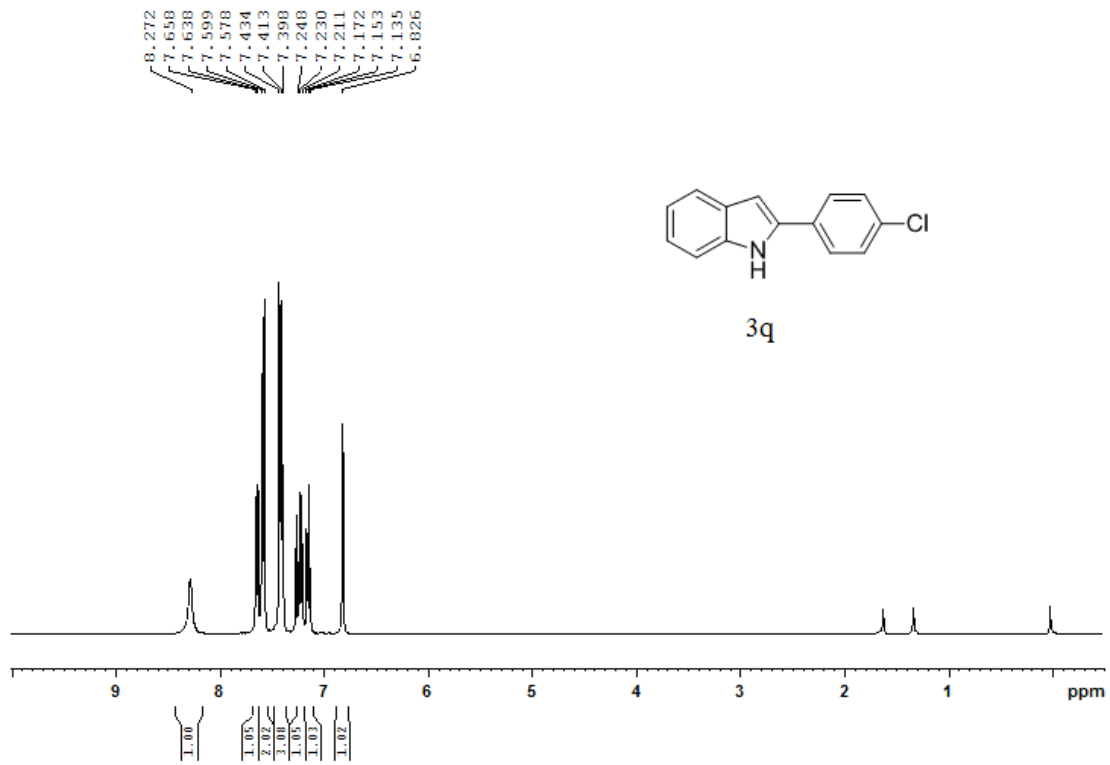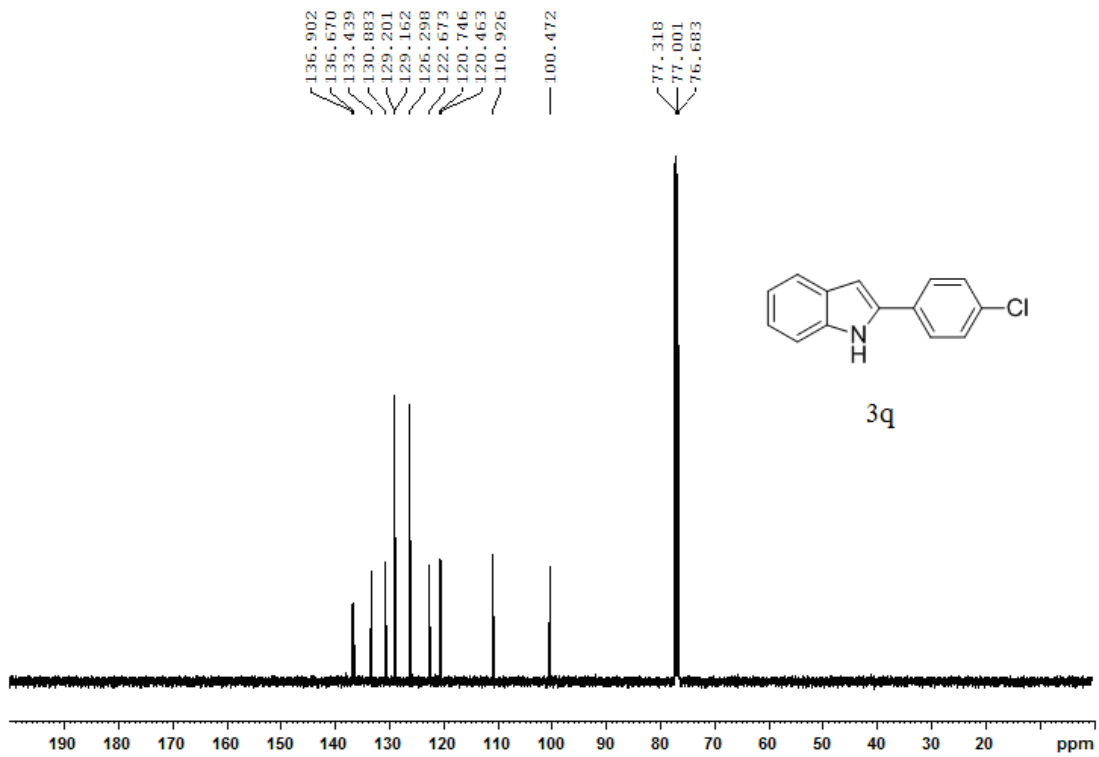

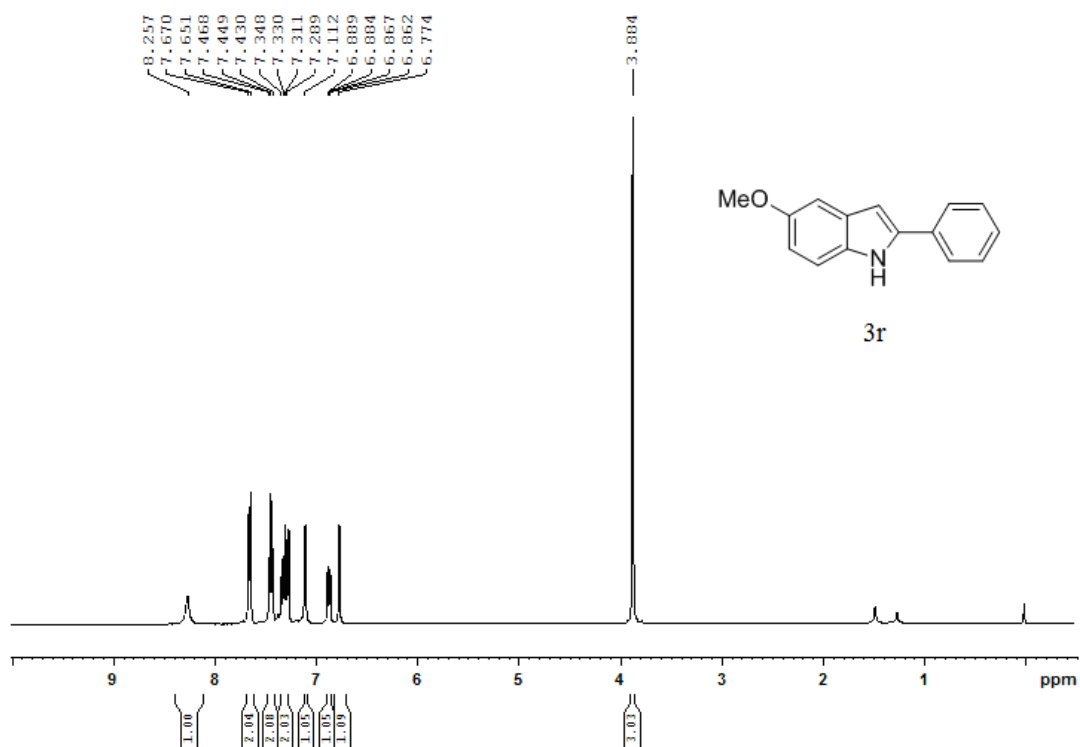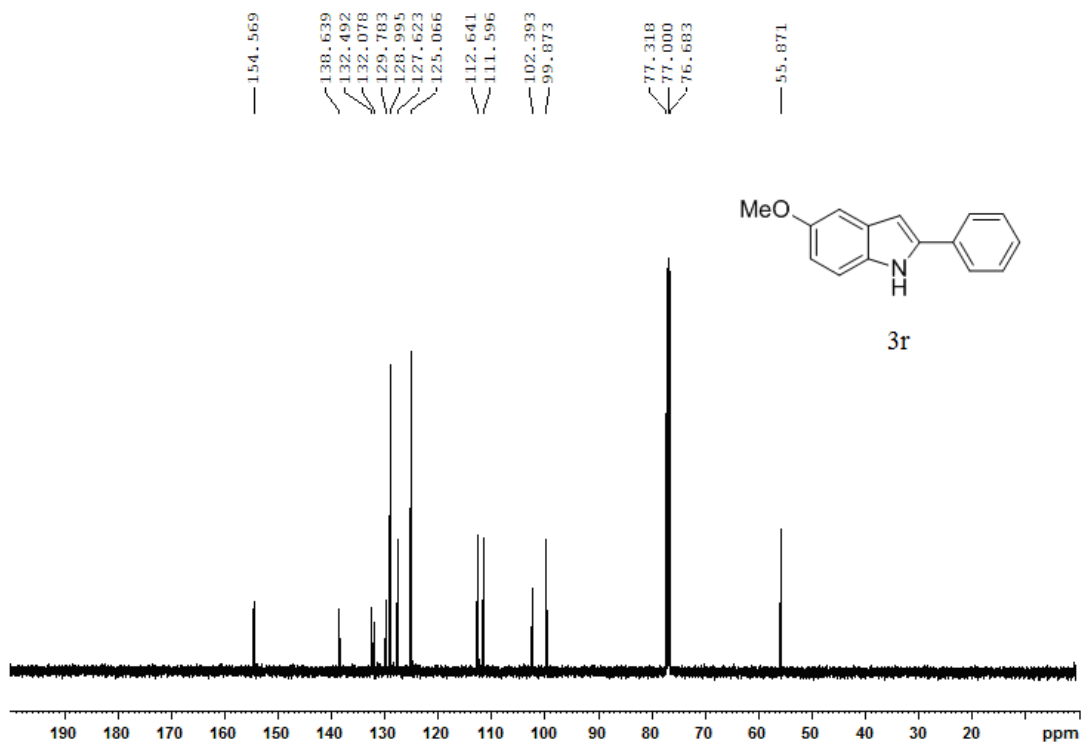

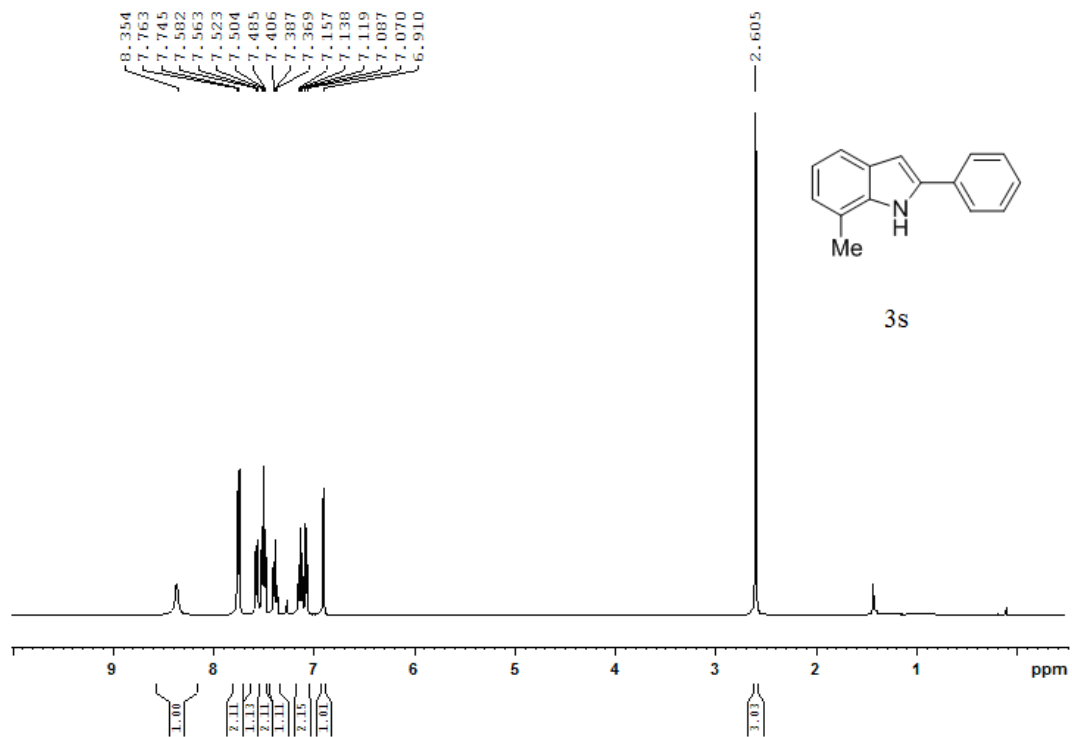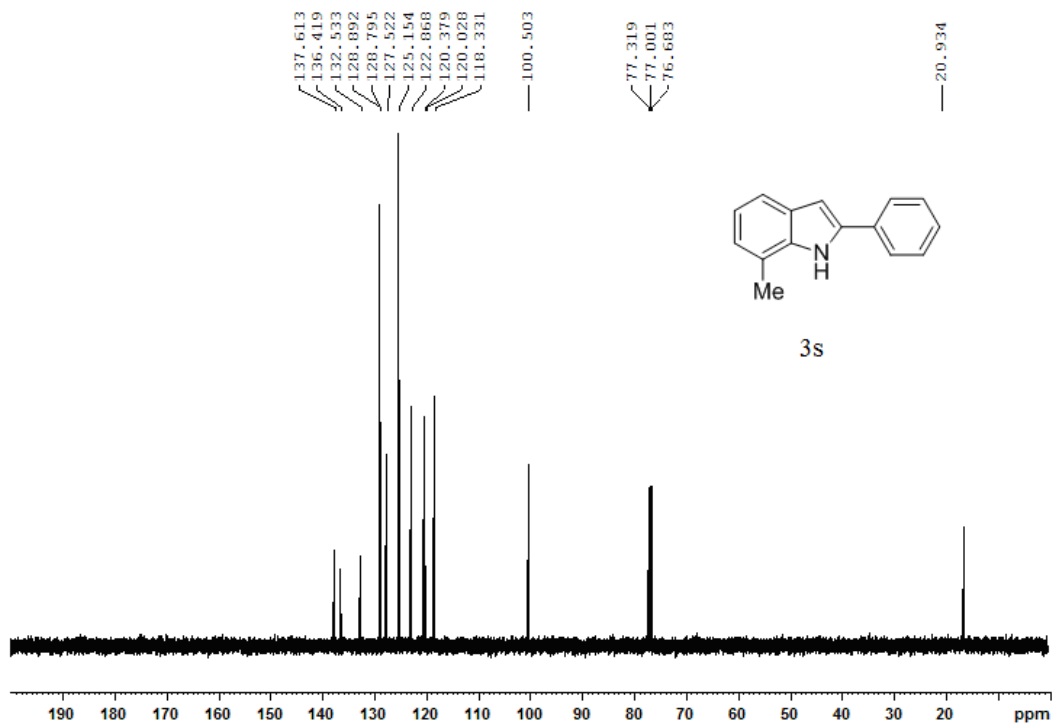

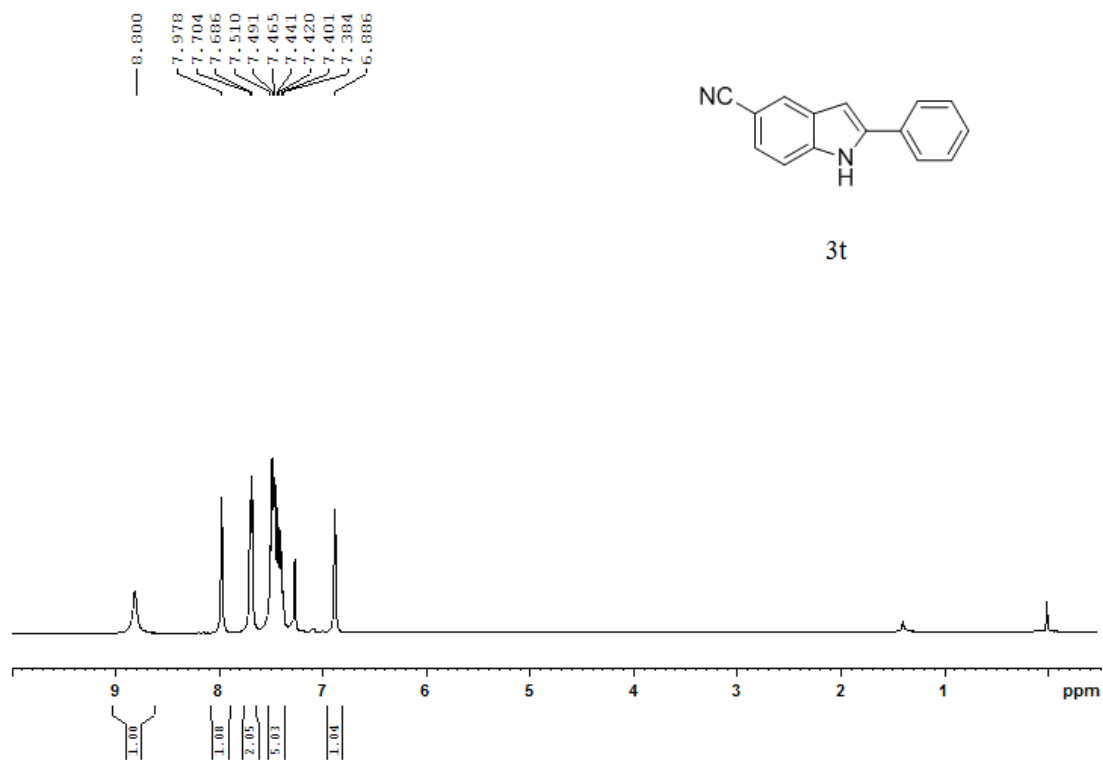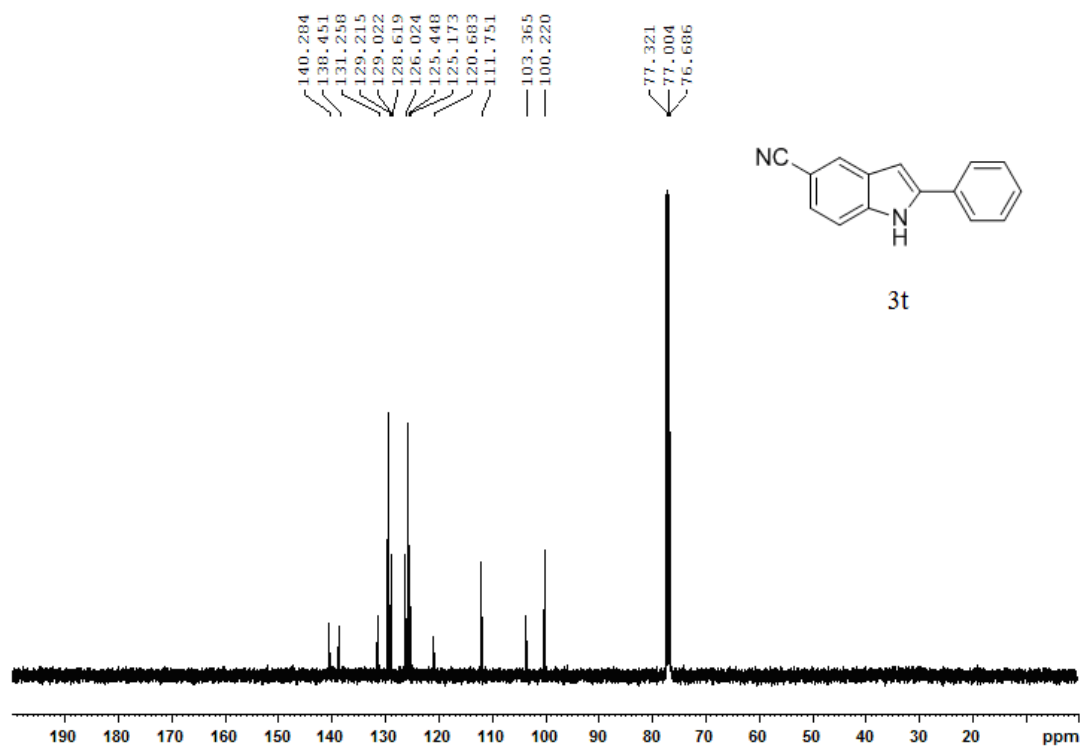

8.334  
7.654  
7.637  
7.551  
7.460  
7.364  
7.348  
7.106  
7.084  
6.938  
6.918  
6.897  
6.811

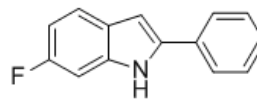

3u

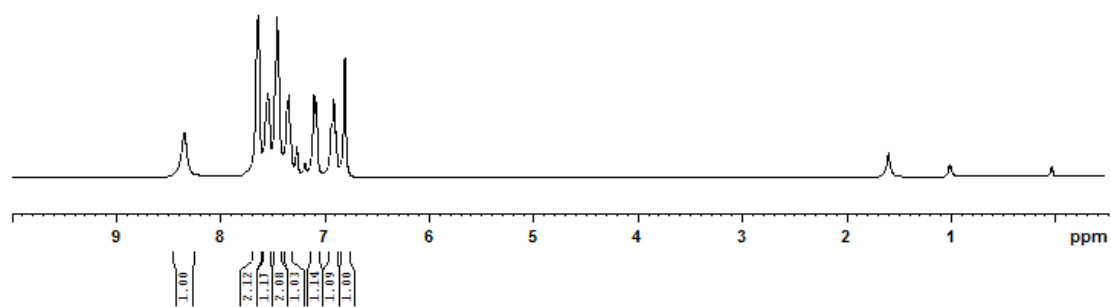

161.249  
158.881  
138.404  
138.365  
136.824  
136.700  
132.138  
129.050  
127.747  
125.803  
124.974  
121.397  
121.297  
109.132  
108.889  
99.865  
97.421  
97.160  
77.317  
77.000  
76.682

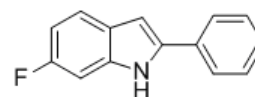

3u

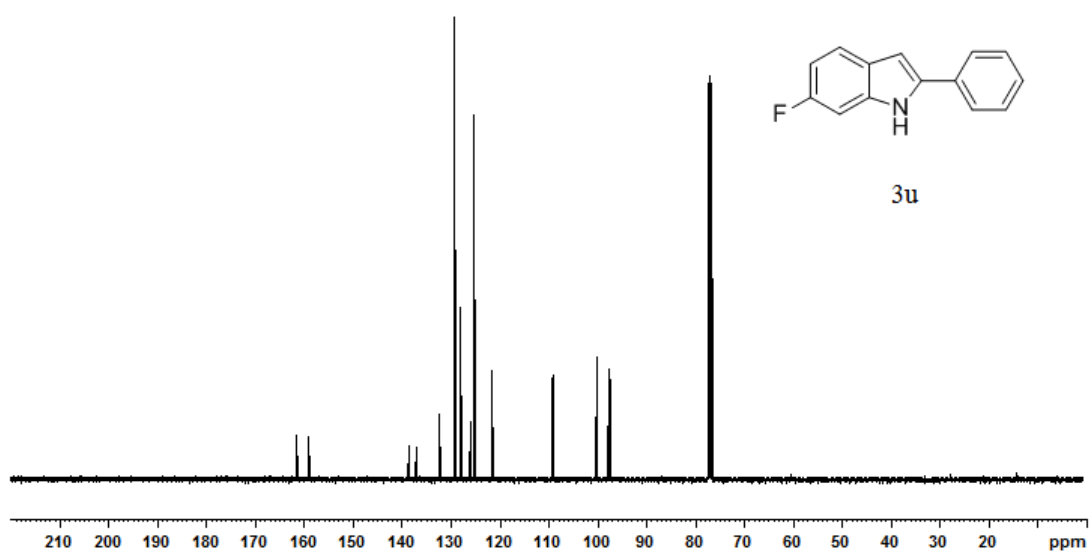

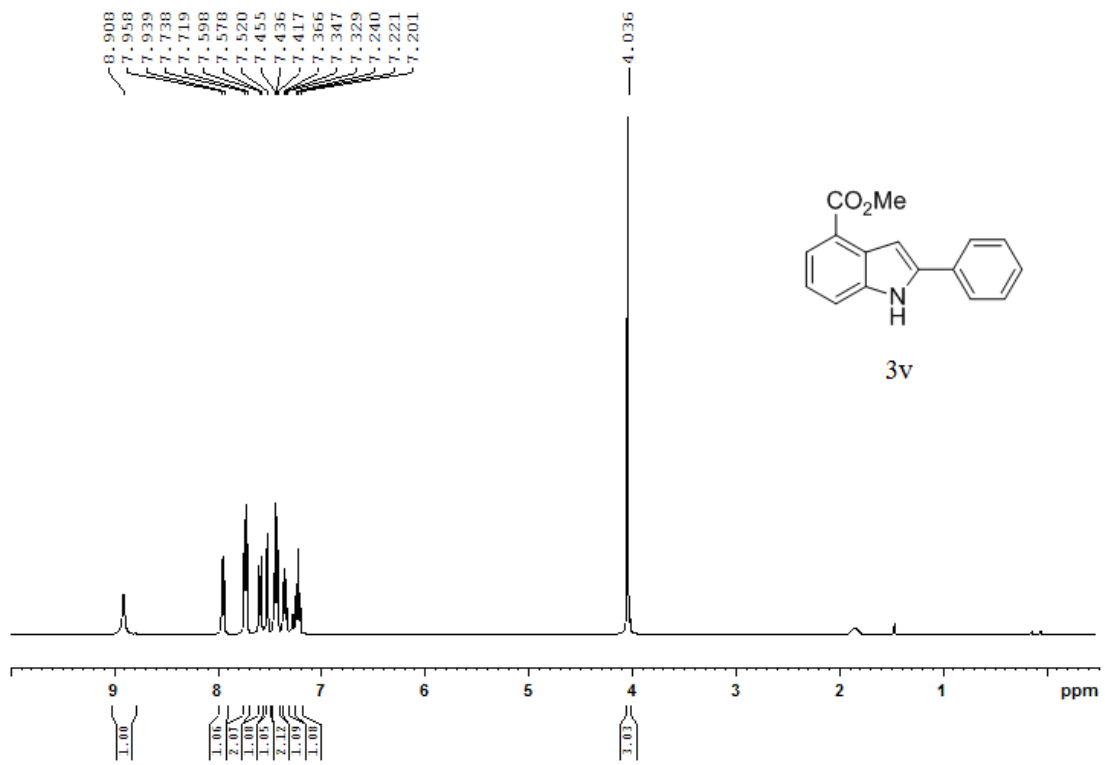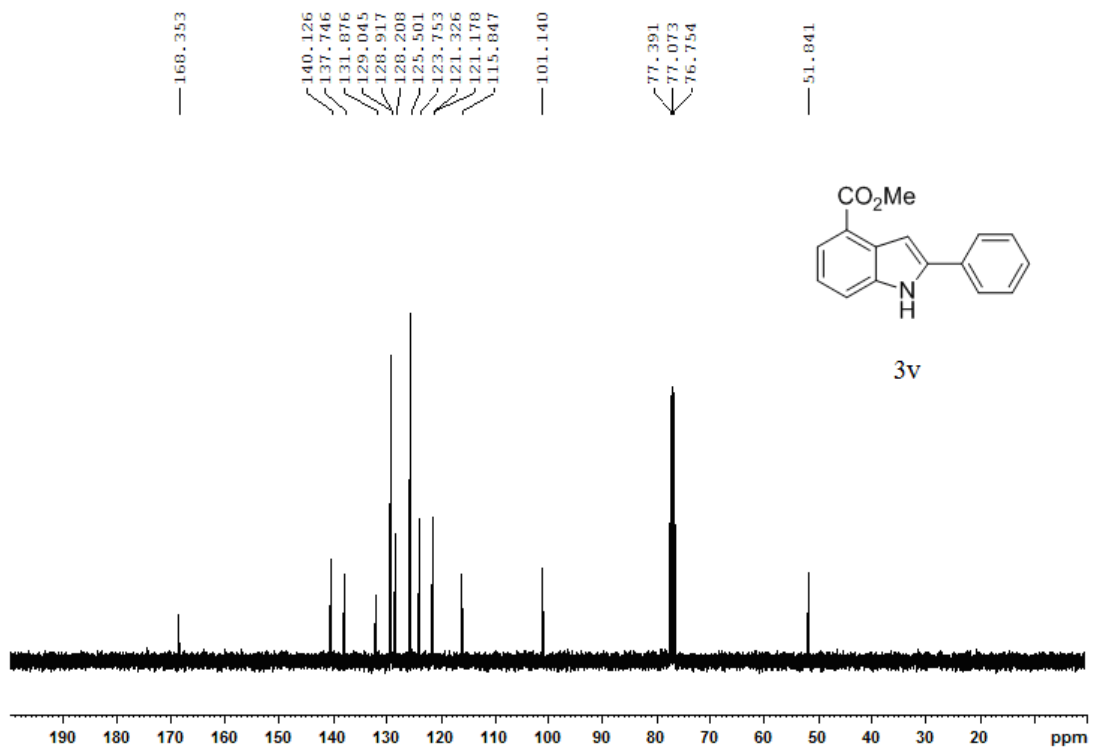

Supplement: c4cy00040d1.pdf [file c4cy00040d1.pdf]
